# Supplementary material
Source: bioRxiv or medRxiv preprint supplement (https://www.medrxiv.org/highwire/filestream/98174/field_highwire_adjunct_files/0/2020.09.23.20200360-1.pdf)

# Appendix

## SUPPLEMENTAL TABLES

|          |                                                                                                                                                           |
|----------|-----------------------------------------------------------------------------------------------------------------------------------------------------------|
| Table S1 | Definitions of outcomes in health records                                                                                                                 |
| Table S2 | GWAS summary statistics data source                                                                                                                       |
| Table S3 | Multivariable Mendelian randomization (MVMR) analysis results for association of body mass index (BMI) with heart failure (HF)                            |
| Table S4 | Mendelian Randomization Pleiotropy RESidual Sum and Outlier (MR-PRESSO) analysis results for association of body mass index (BMI) with heart failure (HF) |
| Table S5 | Univariate Mendelian randomization (MR) analysis results for association of BMI with heart failure outcome adjusted using mtCoJo at summary statistics    |

**Table S1. Definitions of outcomes in health records**

| Trait                   | ICD9 (ONS) | ICD10 (ONS)                     | ICD10 (HES)                                                              | OPCS4 (HES)                                                                                                                                                                                                                                                                                                                                                                                                                                                                                                                                                                                                                                                                                                                                                                                                                                                                                                                                                                                                                                                                                                                                                                                                                                                                                                                                                                                                                                                                                                                                                                                         | Read (CPRD)                                                                                                                                                                                                                                                                                                                                                                                                                                                                                                                                                                                                                                                                                                                                                                                                                                                                                                                                                                                                                                                                                                                                                                                                                                                                                                                                                                                                                                                                                                                                                                                                                                                                                                                                                                                                                                                                                                                                                                                                                                                                                                                                                                                                                                                                                                                                                                                                                                                                                                                                                                                                                                                                                                                                                                                                                                                                                                                                                        | Medications (BNF)                                                                                                                                                                                                                                                                                                                                                                                                                                                                                                                                                                                                      |
|-------------------------|------------|---------------------------------|--------------------------------------------------------------------------|-----------------------------------------------------------------------------------------------------------------------------------------------------------------------------------------------------------------------------------------------------------------------------------------------------------------------------------------------------------------------------------------------------------------------------------------------------------------------------------------------------------------------------------------------------------------------------------------------------------------------------------------------------------------------------------------------------------------------------------------------------------------------------------------------------------------------------------------------------------------------------------------------------------------------------------------------------------------------------------------------------------------------------------------------------------------------------------------------------------------------------------------------------------------------------------------------------------------------------------------------------------------------------------------------------------------------------------------------------------------------------------------------------------------------------------------------------------------------------------------------------------------------------------------------------------------------------------------------------|--------------------------------------------------------------------------------------------------------------------------------------------------------------------------------------------------------------------------------------------------------------------------------------------------------------------------------------------------------------------------------------------------------------------------------------------------------------------------------------------------------------------------------------------------------------------------------------------------------------------------------------------------------------------------------------------------------------------------------------------------------------------------------------------------------------------------------------------------------------------------------------------------------------------------------------------------------------------------------------------------------------------------------------------------------------------------------------------------------------------------------------------------------------------------------------------------------------------------------------------------------------------------------------------------------------------------------------------------------------------------------------------------------------------------------------------------------------------------------------------------------------------------------------------------------------------------------------------------------------------------------------------------------------------------------------------------------------------------------------------------------------------------------------------------------------------------------------------------------------------------------------------------------------------------------------------------------------------------------------------------------------------------------------------------------------------------------------------------------------------------------------------------------------------------------------------------------------------------------------------------------------------------------------------------------------------------------------------------------------------------------------------------------------------------------------------------------------------------------------------------------------------------------------------------------------------------------------------------------------------------------------------------------------------------------------------------------------------------------------------------------------------------------------------------------------------------------------------------------------------------------------------------------------------------------------------------------------------|------------------------------------------------------------------------------------------------------------------------------------------------------------------------------------------------------------------------------------------------------------------------------------------------------------------------------------------------------------------------------------------------------------------------------------------------------------------------------------------------------------------------------------------------------------------------------------------------------------------------|
| Heart failure           | 4151, 428  | I11.0, I13.0, I13.2, I26.0, I50 | I50.0, I50.1, I50.9, I11.0, I13.0, I32.2                                 |                                                                                                                                                                                                                                                                                                                                                                                                                                                                                                                                                                                                                                                                                                                                                                                                                                                                                                                                                                                                                                                                                                                                                                                                                                                                                                                                                                                                                                                                                                                                                                                                     | G580400,G210.00,G210000,G210100,G211100, G21z100,G230.00,G232.00,G234.00,G1yz100, I01..00,662W.00,662p.00,8B29.00,8H2S.00, 9Or0.00,G400.00,G41z.11,G554000,G554011, G58..00,G58..11,G580.00,G580.11,G580.12, G580.13,G580.14,G580000,G580100,G580200, G580300,G581.00,G581.11,G581.13,G581000, G582.00,G58z.00,G58z.12,G5yy900,G5yyA00, R2y1000,Q48y100,585f.00,585g.00                                                                                                                                                                                                                                                                                                                                                                                                                                                                                                                                                                                                                                                                                                                                                                                                                                                                                                                                                                                                                                                                                                                                                                                                                                                                                                                                                                                                                                                                                                                                                                                                                                                                                                                                                                                                                                                                                                                                                                                                                                                                                                                                                                                                                                                                                                                                                                                                                                                                                                                                                                                            |                                                                                                                                                                                                                                                                                                                                                                                                                                                                                                                                                                                                                        |
| Coronary artery disease | -          | -                               | I200, I201, I208, I209, I21, I22, I23, I240, I241, I248, I249, I25, I252 | K40,K40.1,K40.2,K40.3,K40.4,K40.8,K40.9,K41,K4 1.1,K41.2,K41.3,K41.4,K41.8,K41.9,K42,K42.1,K42 .2,K42.3,K42.4,K42.8,K42.9,K43,K43.1,K43.2,K43. 3,K43.4,K43.8,K43.9,K44,K44.1,K44.2,K44.8,K44.9 ,K45,K45.1,K45.2,K45.3,K45.4,K45.5,K45.6,K45.8, K45.9,K46,K46.1,K46.2,K46.3,K46.4,K46.5,K46.8, K46.9                                                                                                                                                                                                                                                                                                                                                                                                                                                                                                                                                                                                                                                                                                                                                                                                                                                                                                                                                                                                                                                                                                                                                                                                                                                                                                 | 1822,1823,1824,1825,1826,1827,1827.11,1828,1829,3233,3234,3235,3236,182..00,182A.00, 182B.00,182B000,182C.00,182Z.00,323..00,323Z.00,889A.00,8HTG.00,8HTJ.00,9Nof.00,G 30..00,G30..12,G30..13,G30..15,G30..16,G300.00,G301.00,G301000,G301100,G301z00,G3 02.00,G303.00,G304.00,G305.00,G306.00,G307.00,G307000,G307100,G308.00,G309.00,G 30B.00,G30X.00,G30X000,G30y.00,G30y000,G30y100,G30y200,G30yz00,G30z.00,G31y1 00,G33z400,G38..00,G380.00,G381.00,G384.00,G38z.00,Gyu3400,R065.00,R065000,R065 011,R065100,R065200,R065300,R065400,R065500,R065600,R065700,R065800,R065900, R065A00,R065B00,R065B14,R065C00,R065D00,R065z00,Ryu0400                                                                                                                                                                                                                                                                                                                                                                                                                                                                                                                                                                                                                                                                                                                                                                                                                                                                                                                                                                                                                                                                                                                                                                                                                                                                                                                                                                                                                                                                                                                                                                                                                                                                                                                                                                                                                                                                                                                                                                                                                                                                                                                                                                                                                                                                                                                         | 2.6.1,2.6.3                                                                                                                                                                                                                                                                                                                                                                                                                                                                                                                                                                                                            |
| Atrial fibrillation     | -          | -                               | I48                                                                      | K01,K011,K012,K018,K019,K02,K021,K022,K023, K024,K025,K026,K028,K029,K04,K041,K042,K043 ,K044,K045,K046,K048,K049,K05,K051,K052,K05 8,K059,K06,K061,K062,K063,K064,K068,K069,K0 7,K071,K072,K073,K078,K079,K08,K081,K082,K0 83,K084,K088,K089,K09,K091,K092,K093,K094,K 095,K096,K098,K099,K10,K101,K102,K103,K104, K105,K108,K109,K11,K111,K112,K113,K114,K115 ,K116,K117,K118,K119,K12,K121,K122,K123,K12 4,K125,K128,K129,K14,K141,K142,K143,K144,K1 45,K148,K149,K15,K151,K152,K158,K159,K17,K1 71,K172,K173,K174,K175,K176,K177,K178,K179, K18,K181,K182,K183,K184,K185,K186,K187,K188 ,K189,K19,K191,K192,K193,K194,K195,K196,K19 8,K199,K20,K201,K202,K203,K204,K208,K209,K2 2,K221,K222,K228,K229,K23,K231,K232,K233,K2 34,K235,K236,K238,K239,K24,K241,K242,K243,K 244,K245,K246,K247,K248,K249,K25,K251,K252, K253,K254,K255,K258,K259,K26,K261,K262,K263 ,K264,K265,K268,K269,K27,K271,K272,K273,K27 4,K275,K276,K278,K279,K28,K281,K282,K283,K2 84,K285,K288,K289,K29,K291,K292,K293,K294,K 295,K296,K297,K298,K299,K30,K301,K302,K303, K304,K305,K308,K309,K31,K311,K312,K313,K314 ,K315,K318,K319,K32,K321,K322,K323,K324,K32 8,K329,K33,K331,K332,K333,K334,K335,K336,K3 38,K339,K34,K341,K342,K343,K344,K345,K346,K 348,K349,K36,K361,K362,K368,K369,K37,K371,K 372,K373,K374,K375,K376,K378,K379,K38,K381, K382,K383,K384,K385,K386,K388,K389,K40,K401 ,K402,K403,K404,K408,K409,K41,K411,K412,K41 3,K414,K418,K419,K42,K421,K422,K423,K424,K4 28,K429,K43,K431,K432,K433,K434,K438,K439,K 44,K441,K442,K448,K449,K45,K451,K452,K453,K 454,K455,K456,K458,K459,K46,K461,K462,K463, | 3272,3273,7900,7901,7902,7902.11,7903,7903.11,7903.12,7903.13,7904,7905,7906,7906.11 ,7907,7907.11,7908,7908.11,7909,7909.11,7910,7910.11,7910.12,7911,7911.11,7911.12,791 2,7912.11,7912.12,7913,7913.11,7913.12,7914,7914.11,7915,7916,7916.11,7917,7917.11,79 18,7920,7920.11,7921,7921.11,7922,7922.11,7923,7923.11,7924,7925,7925.11,7926,7927,7 930,7931,7932,7933,7934,8735,7900000,7901000,7901100,7901200,7901400,7901500,7902 000,7902100,7902300,7902400,7902500,7903000,7903100,7904000,7905000,7905100,7906 000,7906100,7906111,7906200,7906300,7906400,7906500,7907000,7907011,7907100,7907 200,7907300,7907400,7908000,7908100,7908111,7908200,7908300,7908311,7908511,7909 000,7909100,7909300,7910000,7910100,7910200,7910211,7910212,7910213,7910214,7910 300,7910400,7910411,7911000,7911100,7911100,7911300,7911300,7911400,7911411,7912000,7912 100,7912200,7912300,7912511,7913000,7913100,7913200,7913300,7913400,7913411,7914 000,7914000,7914100,7914100,7914200,7914200,7914211,7914211,7914212,7914212,7914 300,7914300,7914400,7914500,7915000,7915100,7915200,7915300,7916000,7916100,7916 200,7916300,7917000,7917100,7917300,7917311,7918000,7918100,7918111,7918200,7918 300,7918400,7918500,7920000,7920100,7920200,7920300,7921000,7921100,7921200,7921 300,7922000,7922100,7922200,7922300,7923000,7923100,7923200,7923300,7924000,7924 100,7924200,7924500,7925000,7925011,7925012,7925100,7925200,7925400,7926000,7926 200,7926300,7927000,7927100,7927200,7927300,7927400,7927500,7930000,7930100,7930 200,7930300,7930400,7931000,7931100,7931200,7932000,7932100,7932111,7932200,7932 400,7932500,7933000,7933300,7934000,7934100,7934400,7934600,7934800,7.90E100,7.90 E111,7.90E200,7.90E211,14N6.00,14S4.00,14S4.00,14T3.00,14T3.00,79..00,79..11,790..0 0,7900z00,7901y00,7901z00,7902y00,7902z00,7903y00,7903z00,7904y00,7904z00,7905z0 0,7906y00,7906z00,7907y00,7907z00,7908y00,7908z00,7909y00,7909z00,790A.00,790A00 0,790A100,790A111,790A300,790A600,790Ay00,790Az00,790B.00,790B000,790B011,790 B012,790B100,790By00,790Bz00,790D.00,790D200,790D400,790D700,790E.00,790E500, 790Ey00,790Ez00,790F.00,790F000,790F100,790G.00,790G000,790G100,790Gy00,790H0 00,790H100,790H200,790H300,790H400,790H500,790Hy00,790Hz00,790J.00,790J000,790 K.00,790K200,790M.00,790M100,790M100,790M400,790M500,790Mz00,790N.00,790N000,790N2 0,790N300,790N400,790N500,790Ny00,791..00,7910y00,7910z00,7911y00,7911z00,7912y 00,7912z00,7913y00,7913z00,7914y00,7914z00,7915y00,7916y00,7916z00,7916z11,7917z 00,7918y00,7918z00,791A.00,791A000,791A100,791A200,791A300,791B.00,791B000,791 B100,791B200,791B400,791B500,791By00,791Bz00,791C.00,791C200,791C300,791C400, 791C500,791Cy00,791D.00,791D000,791D100,791y.00,791z.00,792..00,792..11,7920y00,7 920z00,7921y00,7921z00,7922y00,7922z00,7923z00,7924y00,7924z00,7925y00,7925z00,7 926z00,7927y00,7927z00,792B.00,792B000,792B100,792B200,792By00,792Bz00,792C.00, | 36,45,61,94,188,7 63,786,792,805,83 3,1119,1291,1572, 1573,1781,2302,2 511,3058,3181,32 86,3691,3705,400 4,5441,5858,6262, 6751,7445,7465,8 060,8061,8466,84 67,8749,8832,918 8,9292,9522,1068 7,10871,11380,12 322,12456,13051, 13348,13434,1348 7,13549,14856,15 042,15313,16366, 17119,17679,1796 5,20844,20944,23 078,24635,25238, 27161,27193,2752 3,27727,29024,29 282,29456,30047, 30202,30203,3099 0,31079,31209,31 511,31937,32109, 32164,32553,3308 0,33119,33274,33 391,33578,33612, 33675,33711,3401 7,34019,34023,34 024,34086,34087, 34088,34095,3429 9,34327,34328,34 371,34416,34417, 34418,34515,3451 |

|                        |                                                                                                 |  |                                                                                                                               |                                                                                                                                                                                                                                                                                                                                                                                                                                                                                                                                                                                                                                                                                                                                                                                                                                                                                                                                                                                                                                                                                                                                                                                                                                                                                                                                                                                                                                                                                                                                                                                                                                                                                                                                                                                                                                                         |                                                                                                                                                                                                                                                                                                                                                                                                                                                                                                                                                                 |                                                                                                                                                                                             |
|------------------------|-------------------------------------------------------------------------------------------------|--|-------------------------------------------------------------------------------------------------------------------------------|---------------------------------------------------------------------------------------------------------------------------------------------------------------------------------------------------------------------------------------------------------------------------------------------------------------------------------------------------------------------------------------------------------------------------------------------------------------------------------------------------------------------------------------------------------------------------------------------------------------------------------------------------------------------------------------------------------------------------------------------------------------------------------------------------------------------------------------------------------------------------------------------------------------------------------------------------------------------------------------------------------------------------------------------------------------------------------------------------------------------------------------------------------------------------------------------------------------------------------------------------------------------------------------------------------------------------------------------------------------------------------------------------------------------------------------------------------------------------------------------------------------------------------------------------------------------------------------------------------------------------------------------------------------------------------------------------------------------------------------------------------------------------------------------------------------------------------------------------------|-----------------------------------------------------------------------------------------------------------------------------------------------------------------------------------------------------------------------------------------------------------------------------------------------------------------------------------------------------------------------------------------------------------------------------------------------------------------------------------------------------------------------------------------------------------------|---------------------------------------------------------------------------------------------------------------------------------------------------------------------------------------------|
|                        |                                                                                                 |  |                                                                                                                               | K464,K465,K468,K469,K47,K471,K472,K473,K474,K475,K478,K479,K48,K481,K482,K483,K484,K488,K489,K52,K521,K522,K523,K524,K525,K526,K528,K529,K53,K531,K532,K538,K539,K54,K541,K542,K548,K549,K55,K551,K552,K553,K554,K555,K556,K558,K559,K56,K561,K562,K563,K564,K568,K569,K57,K571,K572,K573,K574,K575,K576,K577,K578,K579,K62,K66,K661,K668,K669,K67,K671,K678,K679,X501,X502,X504                                                                                                                                                                                                                                                                                                                                                                                                                                                                                                                                                                                                                                                                                                                                                                                                                                                                                                                                                                                                                                                                                                                                                                                                                                                                                                                                                                                                                                                                        | 792C000,792Cy00,792Cz00,792D.00,792Dy00,792Dz00,792y.00,792z.00,7930y00,7930z00,7932z00,7933z00,7934y00,7934z00,793A.00,793A.11,793A000,793A100,793Az00,793E.00,793Ey00,793Ez00,793H.00,793Hy00,793L.00,793L000,793L100,793M100,79y..00,79z..00,7L1H200,7M36000,7N4..00,7N40.00,7N40000,7N40100,7N40200,7N40300,7N41400,7N41500,7N41600,8H2O.00,9b8B.00,G573.00,G573000,G573100,G573200,G573300,G573400,G573500,G573z00,P512.00,SP00200,SyuK611,TB01200,ZV15100,ZV42100,ZV42200,ZV42200,ZV43300,ZV43300,ZV45800,ZV45H00,ZV45H00,ZV45K00,ZV45K11,ZV59600,ZVu6e00 | 7,34519,34520,34526,34574,34576,34600,34640,34690,34691,34751,34758,34759,34851,34864,34918,34948,35517,35520,35710,36099,38041,38044,38498,39423,39866,40055,40143,40245,41530,41551,41735 |
| <b>Type 2 diabetes</b> |                                                                                                 |  | E10,<br>E11,<br>E12,<br>O242,<br>E13,<br>E14,<br>G590,<br>G632,<br>H280,<br>H360,<br>M142,<br>N083,<br>O240,<br>O241,<br>O243 | 66An.00,C100000,C100011,C101000,C102000,C103000,C104000,C105000,C106000,C107000,C107300,C108.00,C108.11,C108.12,C108.13,C108000,C108011,C108012,C108100,C108200,C108211,C108212,C108300,C108400,C108411,C108412,C108500,C108511,C108512,C108600,C108700,C108711,C108712,C108800,C108811,C108812,C108900,C108911,C108912,C108A00,C108A11,C108B00,C108C00,C108D00,C108D11,C108E00,C108E11,C108E12,C108F00,C108F11,C108G00,C108H00,C108H11,C108J00,C108J11,C108J12,C10C.12,C10E.00,C10E.11,C10E.12,C10E000,C10E100,C10E112,C10E200,C10E300,C10E311,C10E312,C10E400,C10E411,C10E412,C10E500,C10E511,C10E512,C10E600,C10E700,C10E711,C10E712,C10E800,C10E812,C10E900,C10E911,C10E912,C10EA00,C10EA11,C10EB00,C10EC00,C10EC11,C10ED00,C10EE00,C10EF00,C10EG00,C10EH00,C10EJ00,C10EK00,C10EL00,C10EM00,C10EM11,C10EN00,C10EN11,C10EP00,C10EP11,C10EQ00,C10z000,L180500,M21yC00,M21yC11,ZC2C900,ZRbH.00,66A0.00,C100100,C100111,C100112,C101100,C102100,C103100,C104100,C105100,C106100,C107100,C107200,C107400,C109.00,C109.11,C109.12,C109.13,C109000,C109011,C109012,C109100,C109111,C109112,C109200,C109211,C109212,C109300,C109400,C109411,C109412,C109500,C109511,C109512,C109600,C109611,C109612,C109700,C109711,C109712,C109900,C109A00,C109A11,C109B00,C109B11,C109C00,C109C11,C109C12,C109D00,C109D11,C109D12,C109E00,C109E11,C109E12,C109F00,C109F11,C109F12,C109G00,C109G11,C109G12,C109H00,C109H11,C109H12,C109J00,C109J11,C109J12,C109K00,C10C.11,C10D.00,C10D.11,C10ER00,C10F.00,C10F.11,C10F000,C10F011,C10F100,C10F200,C10F211,C10F300,C10F311,C10F400,C10F411,C10F500,C10F600,C10F611,C10F700,C10F711,C10F900,C10F911,C10FA00,C10FA11,C10FB00,C10FB11,C10FC00,C10FD00,C10FD11,C10FE00,C10FE11,C10FF00,C10FG00,C10FH00,C10FJ00,C10FJ11,C10FK00,C10FL00,C10FL11,C10FM00,C10FM11,C10FN00,C10FP00,C10FQ00,C10FR00,C10y100,C10z100,L180600,ZC2CA00 |                                                                                                                                                                                                                                                                                                                                                                                                                                                                                                                                                                 |                                                                                                                                                                                             |
| <b>Hypertension</b>    | Documented systolic blood pressure >140mmHg or diastolic blood pressure >90mmHg before baseline |  |                                                                                                                               |                                                                                                                                                                                                                                                                                                                                                                                                                                                                                                                                                                                                                                                                                                                                                                                                                                                                                                                                                                                                                                                                                                                                                                                                                                                                                                                                                                                                                                                                                                                                                                                                                                                                                                                                                                                                                                                         |                                                                                                                                                                                                                                                                                                                                                                                                                                                                                                                                                                 |                                                                                                                                                                                             |

**Table S2. GWAS summary statistics data source**

| Trait                                 | Description                                                                                                                                                                                                                                                       | Cohort / Consortium | Imputation reference                                               | Study-level association testing                                                                                                | Study                  | URL                                                                                                 |
|---------------------------------------|-------------------------------------------------------------------------------------------------------------------------------------------------------------------------------------------------------------------------------------------------------------------|---------------------|--------------------------------------------------------------------|--------------------------------------------------------------------------------------------------------------------------------|------------------------|-----------------------------------------------------------------------------------------------------|
| Body mass index                       | a multi-ancestry GWAS meta-analysis of body mass index from 694,649 participants of European ancestry.                                                                                                                                                            | GIANT + UK Biobank  | HapMap2, HRC                                                       | Linear mixed model with rank-based inverse-normal transformed phenotype                                                        | Pulit S et al (2019)   | <a href="https://doi.org/10.1093/hmg/ddy327">https://doi.org/10.1093/hmg/ddy327</a>                 |
| Heart failure                         | a GWAS meta-analysis of 47,309 heart failure cases and 930,014 controls from 26 cohorts of European ancestry                                                                                                                                                      | HERMES              | 1000G (Phase 1 and 3), HapMap2, HRC, population-specific reference | Logistic regression + cox proportional hazard (for incident cases)                                                             | Shah et al (2020)      | <a href="https://doi.org/10.1038/s41467-019-13690-5">https://doi.org/10.1038/s41467-019-13690-5</a> |
| Coronary artery disease               | a multi-ancestry GWAS meta-analysis of 60,801 CAD cases and 123,504 controls from 48 studies                                                                                                                                                                      | CARDIoGRAMplusC4D   | 1000G Phase1 v3                                                    | Logistic regression                                                                                                            | Nikpay et al (2015)    | <a href="https://doi.org/10.1038/ng.3396">https://doi.org/10.1038/ng.3396</a>                       |
| Atrial fibrillation                   | a multi-ancestry GWAS meta-analysis of 65,446 AF cases and more than 522,000 controls from more than 50 studies                                                                                                                                                   | AFGen               | HRC v1.1, 1000G Phase1 v3, population-specific reference           | Logistic regression + cox proportional hazard (for incident cases)                                                             | Roselli et al (2018)   | <a href="https://doi.org/10.1038/s41588-018-0133-9">https://doi.org/10.1038/s41588-018-0133-9</a>   |
| Type 2 diabetes                       | a GWAS meta-analysis of 74,124 type 2 diabetes cases and 824,006 controls of European ancestry.                                                                                                                                                                   | DIAGRAM             | HRC, population-specific reference                                 | Logistic regression + linear mixed model                                                                                       | Mahajan A et al (2018) | <a href="https://doi.org/10.1038/s41588-018-0241-6">https://doi.org/10.1038/s41588-018-0241-6</a>   |
| Systolic and diastolic blood pressure | a GWAS conducted in 329,985 UK Biobank participants of European ancestry. Participants with extreme systolic blood pressure measurement (outside $\pm 7$ SD) and had used blood pressure lowering drugs according to self-reported medication data were excluded. | UK Biobank          | HRC                                                                | Linear mixed model adjusted for 10 genetic principal components using standardised phenotypes and pre-adjusted for sex and age | in-house data          |                                                                                                     |

**Table S3. Multivariable Mendelian randomization (MVMR) analysis results for association of body mass index (BMI) with heart failure (HF)**

**A. Correlated instruments were selected for instrument with lowest P-value for association with BMI**

| Method     | Covariates     | N instrument | beta   | SE     | OR     | OR Lower 95% CI | OR Upper 95% CI |
|------------|----------------|--------------|--------|--------|--------|-----------------|-----------------|
| IVW        | -              | 1684         | 0.4958 | 0.0180 | 1.6418 | 1.5848          | 1.7009          |
| MR-Egger   | -              | 1684         | 0.4740 | 0.0502 | 1.6065 | 1.4559          | 1.7725          |
| WME        | -              | 1684         | 0.5220 | 0.0278 | 1.6855 | 1.5961          | 1.7799          |
| MVMR-IVW   | AF             | 1210         | 0.4503 | 0.0218 | 1.5687 | 1.5030          | 1.6373          |
| MVMR-Egger | AF             | 1210         | 0.4923 | 0.0519 | 1.6361 | 1.4778          | 1.8113          |
| MVMR-IVW   | CAD            | 1154         | 0.4166 | 0.0225 | 1.5167 | 1.4514          | 1.5850          |
| MVMR-Egger | CAD            | 1154         | 0.3683 | 0.0564 | 1.4453 | 1.2939          | 1.6143          |
| MVMR-IVW   | T2D            | 1201         | 0.4273 | 0.0275 | 1.5331 | 1.4526          | 1.6181          |
| MVMR-Egger | T2D            | 1201         | 0.3680 | 0.0640 | 1.4448 | 1.2744          | 1.6379          |
| MVMR-IVW   | SBP            | 1313         | 0.4610 | 0.0231 | 1.5856 | 1.5156          | 1.6589          |
| MVMR-Egger | SBP            | 1313         | 0.5002 | 0.0484 | 1.6490 | 1.4997          | 1.8132          |
| MVMR-IVW   | AF,CAD,T2D,SBP | 1492         | 0.3219 | 0.0262 | 1.3798 | 1.3107          | 1.4525          |
| MVMR-Egger | AF,CAD,T2D,SBP | 1492         | 0.2951 | 0.0488 | 1.3433 | 1.2207          | 1.4782          |

**B. Correlated instruments were selected at random**

| Method     | Covariates     | N instrument | beta   | SE     | OR     | OR Lower 95% CI | OR Upper 95% CI |
|------------|----------------|--------------|--------|--------|--------|-----------------|-----------------|
| IVW        | -              | 1684         | 0.4958 | 0.0180 | 1.6418 | 1.5848          | 1.7009          |
| MR-Egger   | -              | 1684         | 0.4740 | 0.0502 | 1.6065 | 1.4559          | 1.7725          |
| WME        | -              | 1684         | 0.5220 | 0.0278 | 1.6855 | 1.5961          | 1.7799          |
| MVMR-IVW   | AF             | 1209         | 0.4490 | 0.0219 | 1.5668 | 1.5008          | 1.6356          |
| MVMR-Egger | AF             | 1209         | 0.4790 | 0.0514 | 1.6145 | 1.4597          | 1.7857          |
| MVMR-IVW   | CAD            | 1153         | 0.4082 | 0.0225 | 1.5040 | 1.4391          | 1.5719          |
| MVMR-Egger | CAD            | 1153         | 0.3715 | 0.0569 | 1.4499 | 1.2968          | 1.6211          |
| MVMR-IVW   | T2D            | 1195         | 0.4289 | 0.0277 | 1.5356 | 1.4546          | 1.6211          |
| MVMR-Egger | T2D            | 1195         | 0.3652 | 0.0632 | 1.4409 | 1.2730          | 1.6309          |
| MVMR-IVW   | SBP            | 1309         | 0.4597 | 0.0236 | 1.5837 | 1.5122          | 1.6586          |
| MVMR-Egger | SBP            | 1309         | 0.5126 | 0.0490 | 1.6697 | 1.5168          | 1.8380          |
| MVMR-IVW   | AF,CAD,T2D,SBP | 1481         | 0.3301 | 0.0271 | 1.3911 | 1.3191          | 1.4670          |
| MVMR-Egger | AF,CAD,T2D,SBP | 1481         | 0.2962 | 0.0516 | 1.3447 | 1.2154          | 1.4877          |

Estimates shown in the table represent effect of BMI on HF independent of covariates shown in the Covariates column. Covariates "-" represent results from univariate MR analysis. Beta: effect estimate (log odds) for BMI; SE: standard error of the effect estimate; OR: odds ratio; CI: confidence interval; IVW: inverse-variance weighted, MR-Egger: Mendelian Randomisation-Egger, WME: weighted median estimator, MVMR: multivariable Mendelian Randomisation; AF: atrial fibrillation; CAD: coronary artery disease; T2D: type 2 diabetes; SBP: systolic blood pressure.

**Table S4. Mendelian Randomization Pleiotropy RESidual Sum and Outlier (MR-PRESSO) analysis results for association of body mass index (BMI) with heart failure (HF)**

| Method                      | Covariates     | N outlier | beta   | SE     | OR     | OR Lower 95% CI | OR Upper 95% CI | P-value   |
|-----------------------------|----------------|-----------|--------|--------|--------|-----------------|-----------------|-----------|
| MR-PRESSO Raw               | -              | 4         | 0.5031 | 0.0220 | 1.6539 | 1.5841          | 1.7268          | 4.68E-95  |
| MR-PRESSO Outlier-corrected | -              | 4         | 0.5115 | 0.0216 | 1.6678 | 1.5988          | 1.7398          | 7.53E-101 |
| MR-PRESSO Raw               | AF             | 1         | 0.4505 | 0.0218 | 1.5691 | 1.5034          | 1.6377          | 3.26E-81  |
| MR-PRESSO Outlier-corrected | AF             | 1         | 0.5038 | 0.0236 | 1.6550 | 1.5801          | 1.7336          | 1.14E-85  |
| MR-PRESSO Raw               | CAD            | 0         | 0.4166 | 0.0225 | 1.5167 | 1.4514          | 1.5850          | 3.48E-67  |
| MR-PRESSO Outlier-corrected | CAD            | 0         |        |        |        |                 |                 |           |
| MR-PRESSO Raw               | T2D            | 1         | 0.4283 | 0.0275 | 1.5347 | 1.4542          | 1.6197          | 4.60E-49  |
| MR-PRESSO Outlier-corrected | T2D            | 1         | 0.5100 | 0.0247 | 1.6653 | 1.5865          | 1.7481          | 9.22E-79  |
| MR-PRESSO Raw               | SBP            | 1         | 0.4606 | 0.0230 | 1.5850 | 1.5151          | 1.6580          | 8.96E-78  |
| MR-PRESSO Outlier-corrected | SBP            | 1         | 0.5060 | 0.0230 | 1.6586 | 1.5856          | 1.7350          | 2.50E-91  |
| MR-PRESSO Raw               | AF,CAD,T2D,SBP | 0         | 0.3237 | 0.0262 | 1.3822 | 1.3131          | 1.4549          | 3.77E-33  |
| MR-PRESSO Outlier-corrected | AF,CAD,T2D,SBP | 0         |        |        |        |                 |                 |           |

**Table S5. Univariate Mendelian randomization (MR) analysis results for association of BMI with heart failure outcome adjusted using mtCoJo at summary statistics.**

| Method   | mtCOJO adjustment | beta   | SE     | OR     | OR Lower 95% CI | OR Upper 95% CI | P-value   |
|----------|-------------------|--------|--------|--------|-----------------|-----------------|-----------|
| IVW      | Unadjusted        | 0.4958 | 0.0180 | 1.6418 | 1.5848          | 1.7009          | 2.67E-166 |
| MR-Egger | Unadjusted        | 0.4740 | 0.0502 | 1.6065 | 1.4559          | 1.7725          | 3.61E-21  |
| WME      | Unadjusted        | 0.5220 | 0.0278 | 1.6855 | 1.5961          | 1.7799          | 1.24E-78  |
| IVW      | AF                | 0.4523 | 0.0175 | 1.5720 | 1.5189          | 1.6269          | 6.83E-147 |
| MR-Egger | AF                | 0.4244 | 0.0488 | 1.5286 | 1.3893          | 1.6819          | 3.28E-18  |
| WME      | AF                | 0.4672 | 0.0273 | 1.5955 | 1.5123          | 1.6833          | 1.76E-65  |
| IVW      | CAD               | 0.3826 | 0.0181 | 1.4661 | 1.4149          | 1.5191          | 6.74E-99  |
| MR-Egger | CAD               | 0.3123 | 0.0504 | 1.3666 | 1.2380          | 1.5086          | 5.92E-10  |
| WME      | CAD               | 0.3808 | 0.0285 | 1.4634 | 1.3840          | 1.5475          | 9.22E-41  |
| IVW      | T2D               | 0.4455 | 0.0205 | 1.5613 | 1.4999          | 1.6251          | 3.58E-105 |
| MR-Egger | T2D               | 0.4398 | 0.0615 | 1.5524 | 1.3762          | 1.7512          | 8.44E-13  |
| WME      | T2D               | 0.4638 | 0.0329 | 1.5901 | 1.4908          | 1.6960          | 3.76E-45  |
| IVW      | SBP               | 0.5086 | 0.0181 | 1.6629 | 1.6051          | 1.7228          | 1.60E-174 |
| MR-Egger | SBP               | 0.4981 | 0.0520 | 1.6455 | 1.4861          | 1.8221          | 9.99E-22  |
| WME      | SBP               | 0.5247 | 0.0283 | 1.6900 | 1.5989          | 1.7863          | 7.01E-77  |
| IVW      | AF,CAD,T2D,SBP    | 0.4470 | 0.0204 | 1.5636 | 1.5024          | 1.6273          | 1.02E-106 |
| MR-Egger | AF,CAD,T2D,SBP    | 0.3937 | 0.0612 | 1.4825 | 1.3150          | 1.6713          | 1.21E-10  |
| WME      | AF,CAD,T2D,SBP    | 0.4288 | 0.0322 | 1.5354 | 1.4413          | 1.6355          | 2.39E-40  |

Beta: effect estimate (log odds) for BMI;

SE: standard error of the effect estimate;

OR: odds ratio;

CI: confidence interval;

IVW: inverse-variance weighed,

MR-Egger: Mendelian Randomisation-Egger

WME: weighted median estimator,

AF: atrial fibrillation;

CAD: coronary artery disease;

T2D: type 2 diabetes;

SBP: systolic blood pressure



## SUPPLEMENTARY FIGURES

**Figure S1.** Flow chart for specification of the study population

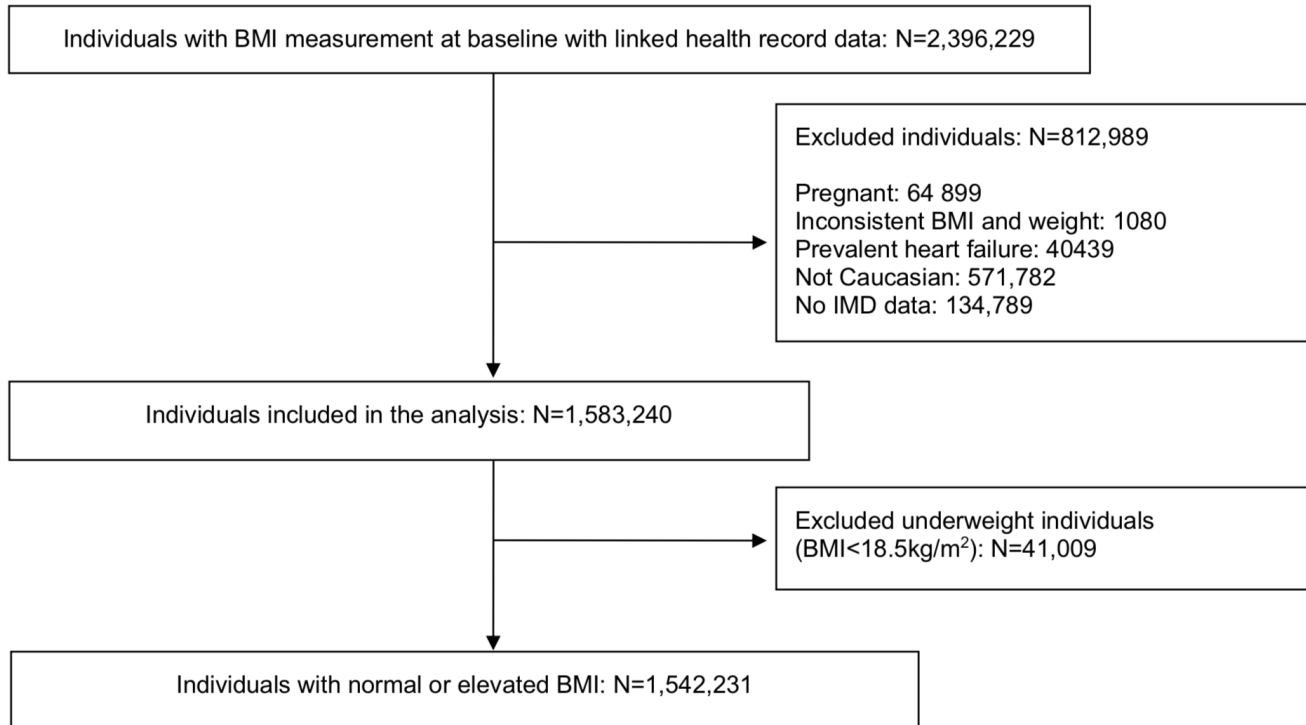

**Figure S2.** Observational association of body mass index categories with incident heart failure in 1,583,240 individuals. Estimated hazard ratios for body mass index (BMI) on incident heart failure, adjusted for age and sex. Hazard ratios are given per 4.807 kg/m<sup>2</sup> increase in BMI, equating to the standard deviation of BMI in UK Biobank.

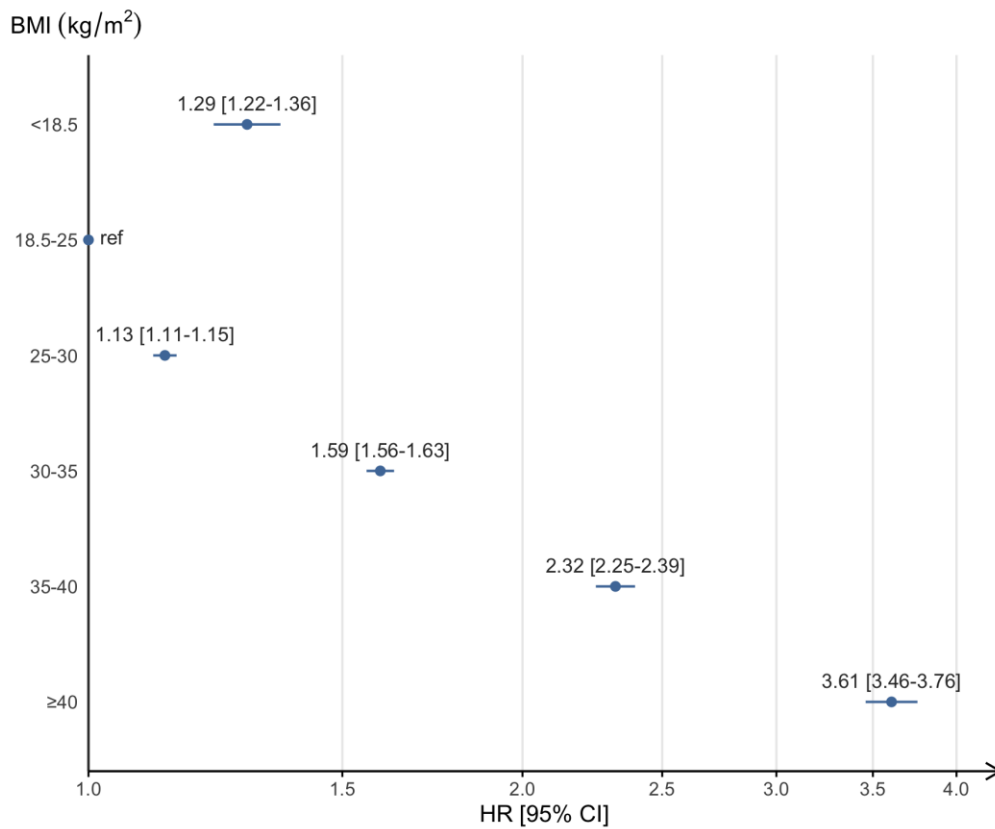

**Figure S3. Sensitivity analyses for phenotypic association of body mass index with incident heart failure.** **A.** Sex stratified analyses adjusted for age and sex (base model), and additional risk factors. **B.** All sample analyses adjusted for age, sex, Index of Multiple Deprivation (base model), and additional risk factors. **C.** Analyses excluding participants with incident heart failure in the first 2 year, adjusted for age and sex (base model), and additional risk factors. For all panels, points and error bars represent adjusted hazard ratios and 95% confidence interval for the effects of body mass index (BMI) on incident heart failure. Hazard ratios are given per 4.807 kg/m<sup>2</sup> increase in BMI, corresponding to the approximate standard deviation of the sample used for genetic inference analyses. HTN, hypertension; AF, atrial fibrillation; CHD, coronary heart disease; DM, diabetes mellitus.

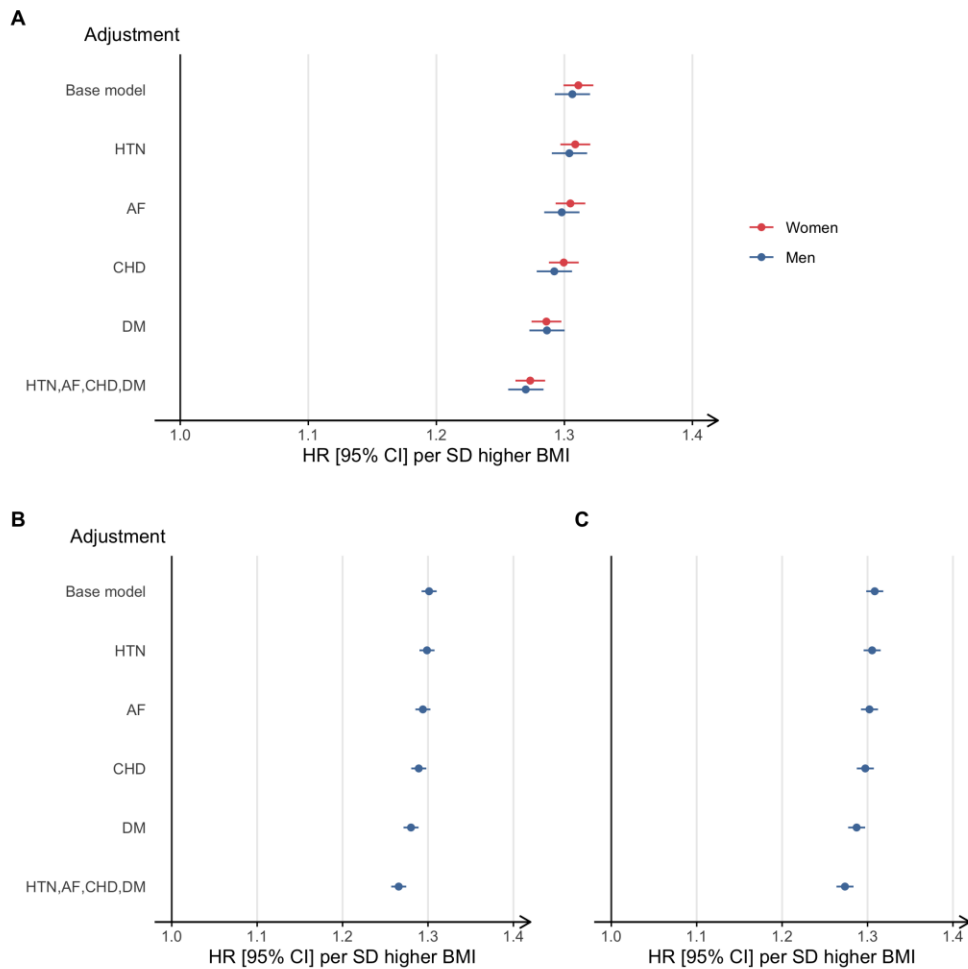

Supplement: Supplementary file [file 2020.09.23.20200360-1.pdf]
